# Supplementary material
Source: Springer Nature journal article supplement (https://www.springerprofessional.de/resource/supplementary/13638_2011_314_MOESM25_ESM.pdf/11897560)

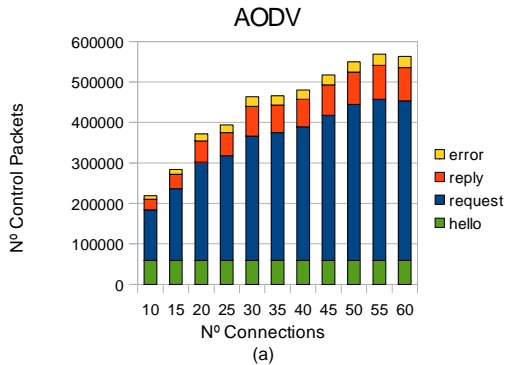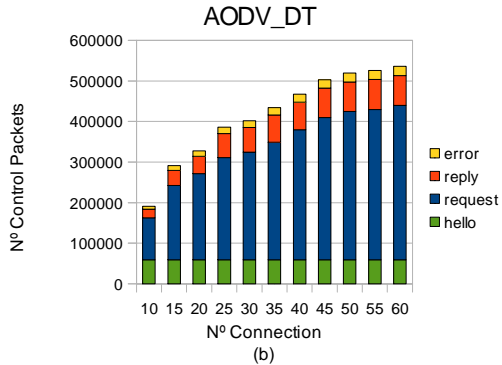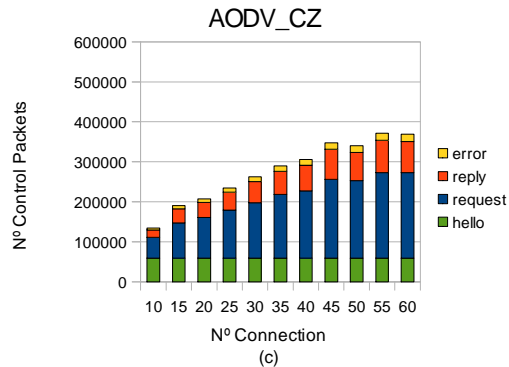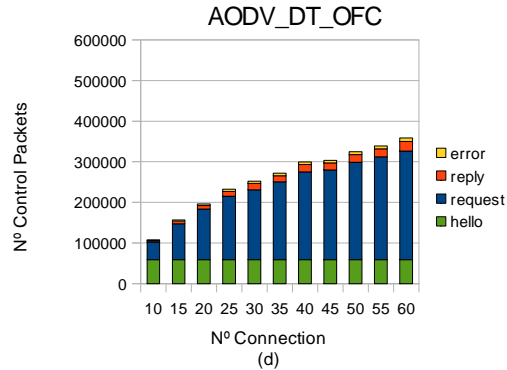

Supplement: MOESM25 [file 11897560]
